# Supplementary material for: Effectiveness of mindfulness based cognitive therapy on weight loss, improvement of hypertension and attentional bias to eating cues in overweight people
Source: PubMed Central journal article supplement — Int J Nurs Sci. 2019 Dec 27;7(1):35–40. doi: 10.1016/j.ijnss.2019.12.010 (PMC7031128; doi:10.1016/j.ijnss.2019.12.010), 2019-12-27
Supplement: mmc1.pdf [file mmc1.pdf]

# 认知疗法对超重人群体重、血压及饮食注意偏向的影响

Mercedeh Masoumi Alamout, Mahdieh Rahmanian, Vahideh Aghamohammadi, Elahe Mohammadi, Khadijeh Nasiri

## 【摘要】

**目的** 超重和肥胖的患病率在世界范围内急剧上升。本研究旨在评估以正念为基础的认知疗法 (mindfulness-based cognitive therapy, MBCT) 对超重和肥胖女性的减轻体重、降低高血压和改善饮食注意偏向的效果。

**方法** 从伊朗沙希德·贝赫什蒂医科大学营养与饮食治疗门诊的女性就诊者中选择 45 例，随机分为 3 组，每组 15 例。第 1 组接受热量限制饮食及 MBCT (共 8 次课程)，第 2 组仅采取热量限制饮食，第 3 组为对照组。在干预前、干预结束时 (8 周后) 和干预结束后 4 周 (12 周后)，对 BMI、血压和及饮食注意偏向进行评估。

**结果** 与第 2 组相比，第 1 组在降低体质量、BMI、收缩压、饮食注意偏向等方面的作用更显著 ( $P<0.01$ )。实施 MBCT 对干预结束后 4 周的舒张压无明显影响。

**结论** 与单纯采取能量限制饮食相比，MBCT 联合能量限制饮食在降低体质量和 BMI、控制高血压和饮食注意偏向等方面更为有效。

**【关键词】** 注意偏向; 体质指数; 认知疗法; 饮食; 高血压; 伊朗; 正念

**通信作者:** Vahideh Aghamohammadi, E-mail: [v\\_agamohammadi@yahoo.com](mailto:v_agamohammadi@yahoo.com)
